# Supplementary material for: Association between Preoperative Medication Lists and Postoperative Hospital Length of Stay after Endoscopic Transsphenoidal Pituitary Surgery
Source: MDPI journal article supplement (doi:10.3390/jcm11195829), 2022-09-30
Supplement: s1 [file s1]

**Supplementary Figure S1.** Extent to which the hospital stay was prolonged beyond 4 days.

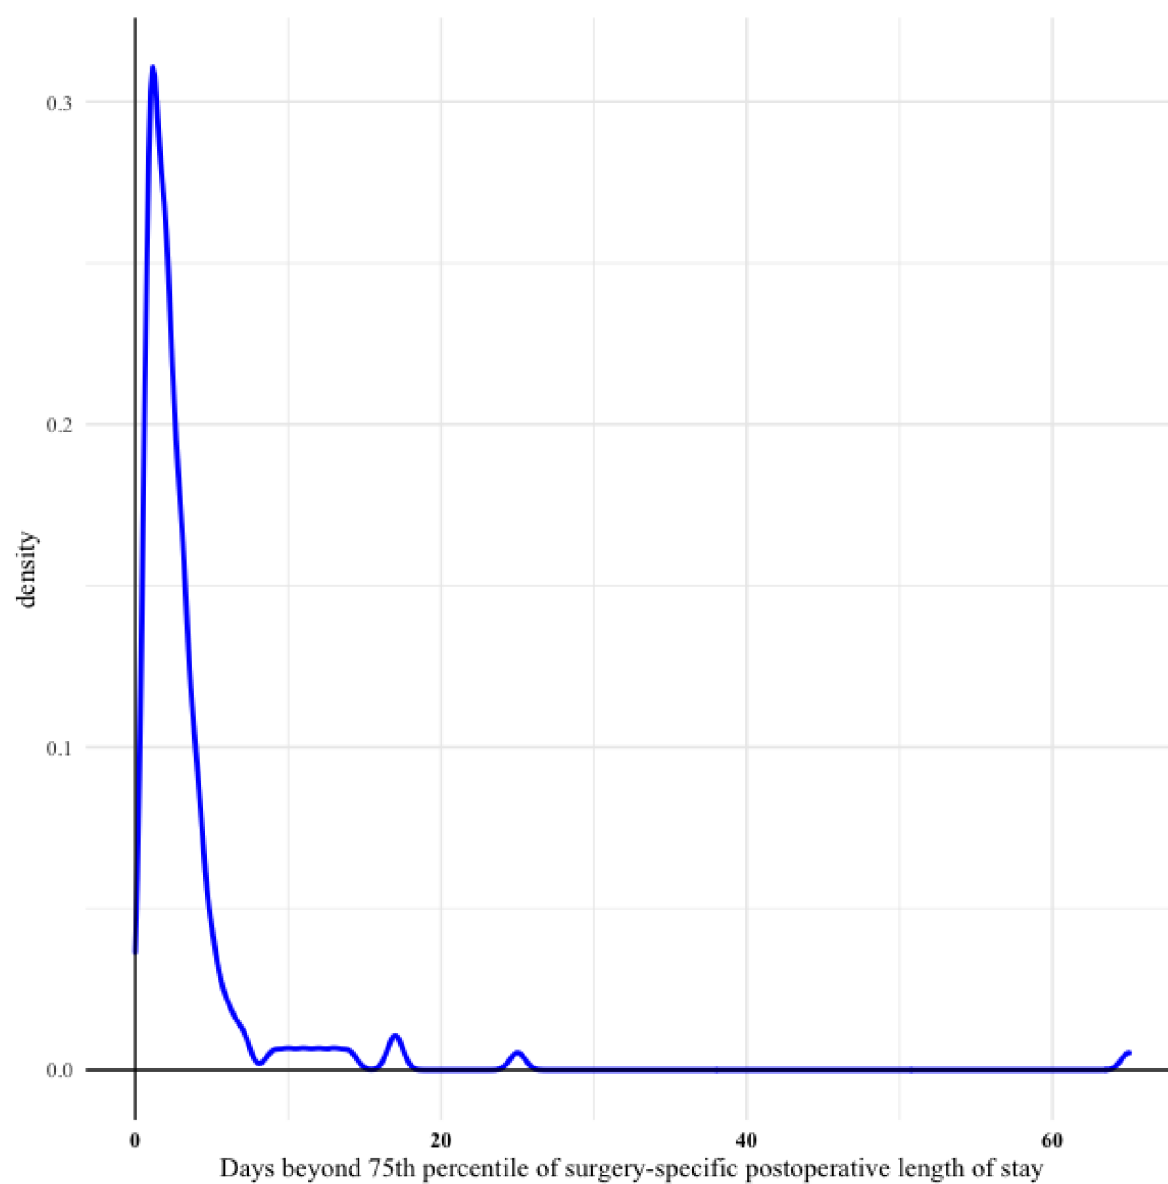

**Supplementary Figure S2.** Distribution of odds ratios related to taking ATC-H drugs in the bootstrapped subsamples.

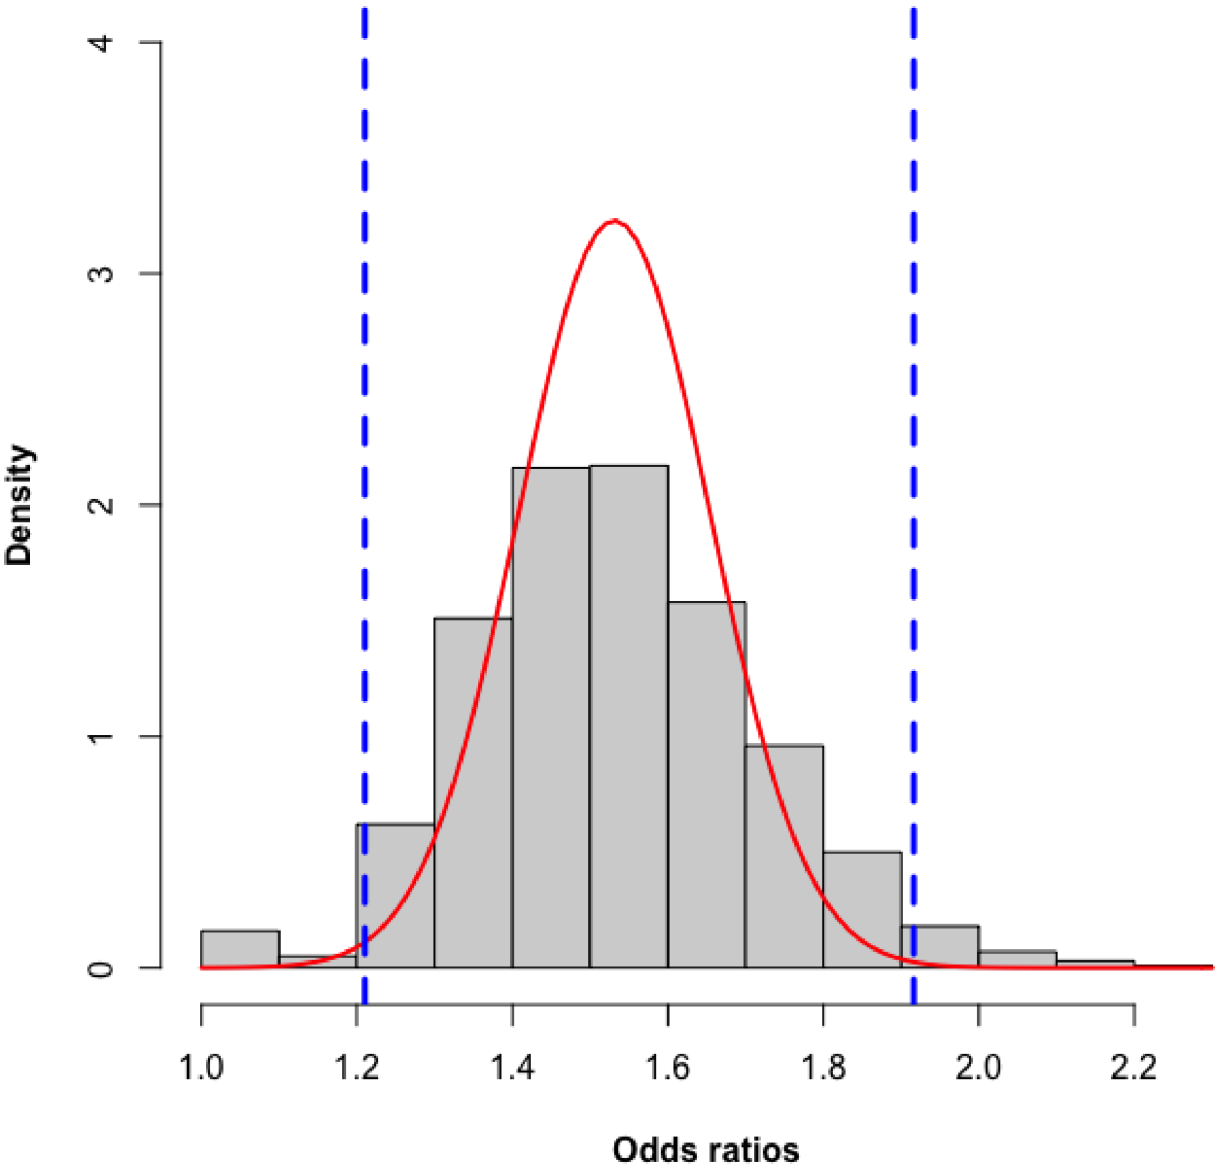

**Supplementary Table S1.** STROBE statement reporting checklist.

|                              | Item No | Recommendation                                                                                                                                                                                    | Page N° |
|------------------------------|---------|---------------------------------------------------------------------------------------------------------------------------------------------------------------------------------------------------|---------|
| Title and abstract           | 1       | (a) Indicate the study’s design with a commonly used term in the title or the abstract                                                                                                            | 2       |
|                              |         | (b) Provide in the abstract an informative and balanced summary of what was done and what was found                                                                                               | 2       |
| Introduction                 |         |                                                                                                                                                                                                   |         |
| Background/<br>rationale     | 2       | Explain the scientific background and rationale for the investigation being reported                                                                                                              | 3       |
| Objectives                   | 3       | State specific objectives, including any prespecified hypotheses                                                                                                                                  | 3       |
| Methods                      |         |                                                                                                                                                                                                   |         |
| Study design                 | 4       | Present key elements of study design early in the paper                                                                                                                                           | 4       |
| Setting                      | 5       | Describe the setting, locations, and relevant dates, including periods of recruitment, exposure, follow-up, and data collection                                                                   | 4       |
| Participants                 | 6       | (a) Give the eligibility criteria, and the sources and methods of selection of participants. Describe methods of follow-up                                                                        | 4-5     |
|                              |         | (b) For matched studies, give matching criteria and number of exposed and unexposed                                                                                                               |         |
| Variables                    | 7       | Clearly define all outcomes, exposures, predictors, potential confounders, and effect modifiers. Give diagnostic criteria, if applicable                                                          | 5       |
| Data sources/<br>measurement | 8       | For each variable of interest, give sources of data and details of methods of assessment (measurement). Describe comparability of assessment methods if there is more than one group              | 5-6     |
| Bias                         | 9       | Describe any efforts to address potential sources of bias                                                                                                                                         | 6-7     |
| Study size                   | 10      | Explain how the study size was arrived at                                                                                                                                                         |         |
| Quantitative<br>variables    | 11      | Explain how quantitative variables were handled in the analyses. If applicable, describe which groupings were chosen and why                                                                      | 6       |
| Statistical<br>methods       | 12      | (a) Describe all statistical methods, including those used to control for confounding                                                                                                             | 6-7     |
|                              |         | (b) Describe any methods used to examine subgroups and interactions                                                                                                                               |         |
|                              |         | (c) Explain how missing data were addressed                                                                                                                                                       | 8-13    |
|                              |         | (d) If applicable, explain how loss to follow-up was addressed                                                                                                                                    | 5       |
|                              |         | (e) Describe any sensitivity analyses                                                                                                                                                             | 6       |
| Results                      |         |                                                                                                                                                                                                   |         |
| Participants                 | 13      | (a) Report numbers of individuals at each stage of study—eg numbers potentially eligible, examined for eligibility, confirmed eligible, included in the study, completing follow-up, and analysed | 8       |

|                          |    |                                                                                                                                                                                                              |             |
|--------------------------|----|--------------------------------------------------------------------------------------------------------------------------------------------------------------------------------------------------------------|-------------|
|                          |    | (b) Give reasons for non-participation at each stage                                                                                                                                                         | 8           |
|                          |    | (c) Consider use of a flow diagram                                                                                                                                                                           | 8           |
| Descriptive data         | 14 | (a) Give characteristics of study participants (eg demographic, clinical, social) and information on exposures and potential confounders                                                                     | 8           |
|                          |    | (b) Indicate number of participants with missing data for each variable of interest                                                                                                                          | 8           |
|                          |    | (c) Summarise follow-up time (eg, average and total amount)                                                                                                                                                  |             |
| Outcome data             | 15 | Report numbers of outcome events or summary measures over time                                                                                                                                               | 8-9         |
| Main results             | 16 | (a) Give unadjusted estimates and, if applicable, confounder-adjusted estimates and their precision (eg, 95% confidence interval). Make clear which confounders were adjusted for and why they were included | 8-9         |
|                          |    | (b) Report category boundaries when continuous variables were categorized                                                                                                                                    |             |
|                          |    | (c) If relevant, consider translating estimates of relative risk into absolute risk for a meaningful time period                                                                                             |             |
| Other analyses           | 17 | Report other analyses done—eg analyses of subgroups and interactions, and sensitivity analyses                                                                                                               | 9           |
| <b>Discussion</b>        |    |                                                                                                                                                                                                              |             |
| Key results              | 18 | Summarise key results with reference to study objectives                                                                                                                                                     | 10          |
| Limitations              | 19 | Discuss limitations of the study, taking into account sources of potential bias or imprecision. Discuss both direction and magnitude of any potential bias                                                   | 12-13       |
| Interpretation           | 20 | Give a cautious overall interpretation of results considering objectives, limitations, multiplicity of analyses, results from similar studies, and other relevant evidence                                   | 10-11-12-13 |
| Generalisability         | 21 | Discuss the generalisability (external validity) of the study results                                                                                                                                        | 13          |
| <b>Other information</b> |    |                                                                                                                                                                                                              |             |
| Funding                  | 22 | Give the source of funding and the role of the funders for the present study and, if applicable, for the original study on which the present article is based                                                | 15          |

**Supplementary Table S2.** Details of preoperative medications.

|                                                                           |   |           |
|---------------------------------------------------------------------------|---|-----------|
|                                                                           |   | N = 704   |
| ATC-A Alimentary tract and metabolism                                     |   |           |
|                                                                           | 0 | 514 (73%) |
|                                                                           | 1 | 115 (16%) |
|                                                                           | 2 | 44 (6.2%) |
|                                                                           | 3 | 23 (3.3%) |
|                                                                           | 4 | 6 (0.9%)  |
|                                                                           | 5 | 2 (0.3%)  |
| ATC-B Blood and blood forming organs                                      |   |           |
|                                                                           | 0 | 614 (87%) |
|                                                                           | 1 | 78 (11%)  |
|                                                                           | 2 | 11 (1.6%) |
|                                                                           | 3 | 1 (0.1%)  |
| ATC-C Cardiovascular system                                               |   |           |
|                                                                           | 0 | 411 (58%) |
|                                                                           | 1 | 145 (21%) |
|                                                                           | 2 | 90 (13%)  |
|                                                                           | 3 | 40 (5.7%) |
|                                                                           | 4 | 10 (1.4%) |
|                                                                           | 5 | 6 (0.9%)  |
|                                                                           | 6 | 2 (0.3%)  |
| ATC-G Genito-urinary system and sex hormones                              |   |           |
|                                                                           | 0 | 623 (88%) |
|                                                                           | 1 | 72 (10%)  |
|                                                                           | 2 | 8 (1.1%)  |
|                                                                           | 3 | 1 (0.1%)  |
| ATC-H Systemic hormonal preparations, excluding sex hormones and insulins |   |           |
|                                                                           | 0 | 472 (67%) |
|                                                                           | 1 | 139 (20%) |
|                                                                           | 2 | 85 (12%)  |
|                                                                           | 3 | 6 (0.9%)  |

|                                                           |   |            |
|-----------------------------------------------------------|---|------------|
|                                                           | 4 | 2 (0.3%)   |
| ATC-J Anti-infectives for systemic use                    |   |            |
|                                                           | 0 | 678 (96%)  |
|                                                           | 1 | 24 (3.4%)  |
|                                                           | 2 | 1 (0.1%)   |
|                                                           | 3 | 1 (0.1%)   |
| ATC-L Antineoplastic and immunomodulating agents          |   |            |
|                                                           | 0 | 692 (98%)  |
|                                                           | 1 | 11 (1.6%)  |
|                                                           | 2 | 1 (0.1%)   |
| ATC-M Musculo-skeletal system                             |   |            |
|                                                           | 0 | 661 (94%)  |
|                                                           | 1 | 43 (6.1%)  |
| ATC-N Nervous system                                      |   |            |
|                                                           | 0 | 554 (79%)  |
|                                                           | 1 | 88 (12%)   |
|                                                           | 2 | 41 (5.8%)  |
|                                                           | 3 | 13 (1.8%)  |
|                                                           | 4 | 3 (0.4%)   |
|                                                           | 5 | 2 (0.3%)   |
|                                                           | 6 | 1 (0.1%)   |
|                                                           | 7 | 2 (0.3%)   |
| ATC-P Antiparasitic products, insecticides and repellents |   |            |
|                                                           | 0 | 703 (100%) |
|                                                           | 1 | 1 (0.1%)   |
| ATC-R Respiratory system                                  |   |            |
|                                                           | 0 | 652 (93%)  |
|                                                           | 1 | 38 (5.4%)  |
|                                                           | 2 | 8 (1.1%)   |
|                                                           | 3 | 6 (0.9%)   |

Data are presented as number(%)
